# Supplementary material
Source: PubMed Central journal article supplement (PMC8294803)
Supplement: ehp7169.s001.acco.pdf [file ehp7169.s001.acco.pdf]

**Note to readers with disabilities:** *EHP* strives to ensure that all journal content is accessible to all readers. However, some figures and Supplemental Material published in *EHP* articles may not conform to [508 standards](#) due to the complexity of the information being presented. If you need assistance accessing journal content, please contact [ehp508@niehs.nih.gov](mailto:ehp508@niehs.nih.gov). Our staff will work with you to assess and meet your accessibility needs within 3 working days.

### **Supplemental Material**

#### **A Roadmap to the Structure-Related Metabolism Pathways of Per- and Polyfluoroalkyl Substances in the Early Life Stages of Zebrafish (*Danio rerio*)**

Jiajun Han, Wen Gu, Holly Barrett, Diwen Yang, Song Tang, Jianxian Sun, Jiabao Liu, Henry M. Krause, Keith A. Houck, and Hui Peng

#### **Table of Contents**

**Table S1.** Chemical information and structures of 74 PFAS from the U.S. EPA PFASs screening library.

**Table S2.** Among 74 PFAS, 36 ionizable PFAS were subjected for BCF analysis and 25 PFAS were detectable in zebrafish larvae. 31 PFAS from five structural categories prone to metabolism were selected for metabolite profiling with non-targeted analysis.

**Table S3.** Summary of 28 PFAS that were detectable in zebrafish larvae, including concentrations in medium ( $\mu\text{M}$ ), recovery (%) and method detection limit (MDL) (ng/g).

**Table S4.** Bioaccumulations and toxicities of 74 PFAS in early life stage (ELS) of zebrafish. Bioconcentration factors (BCFs, L/kg) are shown for PFAS at both  $0.5\mu\text{M}$  and  $5\mu\text{M}$ . Mortality was only shown for higher concentrations of  $5\mu\text{M}$ ,  $N=12-20$ .

**Table S5.** Information of nine PFAS considered as high affinity liver fatty acid binding protein (L-FABP) ligands ( $K_d < 20\mu\text{M}$ ) (Yang et al. 2020).

**Table S6.** Peak intensities of metabolites detected in zebrafish larvae exposed to 15 fluorotelomer alcohols (FTOHs) at  $5\mu\text{M}$  and 120 hpf.

**Figure S1.** Relationships between BCFs and exposure concentrations. (A) Comparison of the BCFs of PFAS in zebrafish larvae at 120 hpf, at  $0.5\mu\text{M}$  and  $5\mu\text{M}$ . Dots represent mean  $\pm$  SD ( $n=3$ ). (B) The ratios of BCFs at  $5\mu\text{M}$  to  $0.5\mu\text{M}$ . Notes: PFAS, per- and polyfluoroalkyl substances; BCFs, bioconcentration factor. The summary data can be found in Table S3. The lines from panel A represent stepwise linear trends.

**Figure S2.** Metabolites of NMe-FOSA and NEt-FOSA. Nontargeted detection of metabolites in zebrafish larvae exposed to 5  $\mu$ M of NMe-FOSA (top panel) and NEt-FOSA (bottom panel) was accomplished using the R scripts as detailed in method section. The sizes and colors of the dots are proportional to intensities. PFOS (46) and PFOSA (60) were confirmed with authentic standards (confidence level 1). Notes: NMe-FOSA, N-Methylperfluorooctanesulfonamide; NEt-FOSA, N-Ethylperfluorooctanesulfonamide; PFOSA, perfluorooctanesulfonamide; PFOS, perfluorooctanesulfonic acid.

**Figure S3.** Metabolites of perfluorooctane sulfonamide quaternary ammonium salt (PFOSAmS, 5). Tentative identification of metabolites from PFOSAmS was accomplished by interpreting the high-resolution MS<sup>2</sup> spectra of the three most abundant metabolite.

**Figure S4.** Representative chromatograms of shorter-chain PFCAs in zebrafish larvae metabolized from perfluoroalkyl carboxamides. (A) The chromatograms of 1H-PFPeA metabolized from amide 38 (top), and 1H-PFBA (bottom) directly exposed to zebrafish larvae. (B) The chromatograms of PFPeA metabolized from amide 19 (top), and PFHxA directly exposed to zebrafish larvae. (C) The chromatograms of PFBA metabolized from amide 38 (top), and PFBA directly exposed to zebrafish larvae. 1H-PFBA (4), PFHxA (20), PFBA (12) and PFPeA were confirmed with authentic standards (confidence level 1). The authentic standard of 1H-PFPeA was not available (confidence level 3). Note: PFBA, perfluorobutanoic acid; PFHxA, perfluorohexanoic acid; PFPeA, perfluoropentanoic Acid.

**Figure S5.** Time courses of carboxamides and polyfluoroalkyl carboxylic acids metabolites. Parent compound and carboxylic acids metabolites of 19, 31 and 38 were monitored separately across development in zebrafish exposed to 5  $\mu$ M of each parent carboxamides. The peak areas of polyfluoroalkyl carboxylic acid metabolites were plotted against the left y-axis, while the peak area of carboxamide 38 was plotted against the right y-axis. Perfluorobutanoic acid (PFBA, 12) and perfluoropentanoic acid (PFPeA) were confirmed with authentic standards (confidence level 1). The authentic standard of 1H-PFPeA was not available (confidence level 3). The summary data can be found in Excel Table S8.

**Figure S6.** Hydrolysis products of 8:2 FTOH. Representative metabolites of 8:2 FTOH were detected in zebrafish larvae exposed to 5 $\mu$ M of 8:2 FTOH after 120h exposure. (A) Chromatograms of representative metabolites; (B) Proposed metabolism pathways. PFOA (74) was confirmed with authentic standards (confidence level 1). The authentic standards of 7:3 FTUCA, 8:2 FTUCA, 8:2 FTOH sulfate, 8:2 FTOH Gluc, 7:3 FTUCA cysteine were not available (confidence level 3). Note: FTOHs, fluorotelomer alcohols; FTUCA, fluorotelomer unsaturated carboxylic acids; PFOA, perfluorooctanoic acid.

**Figure S7.** Metabolites of two FTOH. Metabolites detected in zebrafish larvae exposed to H-6:1 FTOH (67) and 4:4 FTOH (40) were plotted versus the intensities of metabolites from 8:2 FTOH. Blue dots represent metabolites showing significantly higher fold-changes (FC>20,  $p$ <0.05, student's t-test) relative to 8:2 FTOH. The authentic standards of 1H-PFHxA, 6:1 FTOH sulfate and 6:1 FTOH glucuronide were not available (confidence level 3). Note: FTOHs, fluorotelomer alcohols; PFHxA, perfluorohexanoic acid.

**Figure S8.** Taurine metabolites of PFAS 49, 30, and 56 in zebrafish. Taurine conjugates from PFAS were identified by employing high-resolution MS<sup>2</sup> spectra. The authentic standards of metabolites were not available, so they were tentatively identified at confidence level 3.

**Figure S9.** Metabolite of 6:2 FTMAC. 6:2 FTOH sulfate was detected in zebrafish larvae exposed to 5 μM of compound 2. The chromatograms of 6:2 FTOH sulfate from compound 2 and the control are shown in the top and bottom panels. Note that minor background contamination was detected from the control. The proposed metabolism pathway of compound 2 is shown on the right. 6:2 FTOH (70) was confirmed with authentic standards (confidence level 1). The authentic standards of 6:2 FTOH sulfate was not available (confidence level 3). Note: FTOHs, fluorotelomer alcohols.

**Figure S10.** Hydrolysis of polyfluoroalkyl carboxamide 19 by hCES1. Reaction mixtures contained various concentrations 19 and 100 μg/L human recombinant human liver carboxylesterase 1 (*hCES1*) was incubated with 100 μL phosphate buffer at 37 °C for 1 hour, N=3. (A) The percentages of parent PFAS hydrolyzed by *hCES1*. (B) The concentrations of corresponding hydrolysis product perfluoropentanoic acid (PFPeA) detected. One-way ANOVA with Dunnett test was employed for the statistical test. Asterisk indicates \*0.01 < p < 0.05, \*\*0.01 < p < 0.001 and \*\*\*p < 0.0001. Bars represent mean ± SD (n=3). Notes: The summary data can be found in Excel Tables S9 and S10.

**Figure S11.** Structures of hydrolysis products detected in human recombinant human liver carboxylesterase 1 (*hCES1*) hydrolysis assay. Perfluorobutanoic acid (PFBA, 12) and perfluoropentanoic acid (PFPeA) were confirmed with authentic standards, the confidence level was assigned to level 1. The authentic standards of 1H-PFPeA and 4:3 fluorotelomer carboxylic acid (FTCA) were not available, so they were confirmed with high resolution MS<sup>1</sup> and MS<sup>2</sup> spectra at confidence level 3.

## References

**Additional File-** Excel Document

**Table S1:** Chemical information and structures of 74 PFAS from the U.S. EPA PFASs screening library.

| ID | CAS        | Preferred Name                                       | Abbreviation   | Category    | Vapor pressure <sup>a</sup> | Molecular Formula                                                               | Structure                                                                             |
|----|------------|------------------------------------------------------|----------------|-------------|-----------------------------|---------------------------------------------------------------------------------|---------------------------------------------------------------------------------------|
| 1  | 58244-27-2 | Tris(Trifluoroethoxy)methane                         |                | Ether       | 0.46                        | C <sub>7</sub> H <sub>7</sub> F <sub>9</sub> O <sub>3</sub>                     | 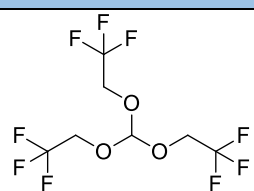   |
| 2  | 2144-53-8  | 6:2 Fluorotelomer methacrylate                       | 6:2 FTMAC      | Ester       | 0                           | C <sub>12</sub> H <sub>9</sub> F <sub>13</sub> O <sub>2</sub>                   |    |
| 3  | 28523-86-6 | Sevoflurane                                          |                | Ether       | 246.49                      | C <sub>4</sub> H <sub>3</sub> F <sub>7</sub> O                                  |    |
| 4  | 679-12-9   | 4H-Perfluorobutanoic acid                            | H-PFBA         | Carboxylate | 0.91                        | C <sub>4</sub> H <sub>2</sub> F <sub>6</sub> O <sub>2</sub>                     |   |
| 5  | 1652-63-7  | Perfluorooctanesulfonamide ammonium iodide           | PFOSAmS        | Sulfonamide | 0                           | C <sub>14</sub> H <sub>16</sub> F <sub>17</sub> N <sub>2</sub> O <sub>2</sub> S |  |
| 6  | 2795-39-3  | Potassium perfluorooctanesulfonate                   | Potassium PFOS | Sulfonate   | 0.01                        | C <sub>8</sub> F <sub>17</sub> KO <sub>3</sub> S                                |  |
| 7  | 55621-21-1 | Perfluoro-3,6-dioxaoctane-1,8-dioic acid             |                | Carboxylate | 0                           | C <sub>6</sub> H <sub>2</sub> F <sub>8</sub> O <sub>6</sub>                     |  |
| 8  | 375-72-4   | Perfluorobutanesulfonyl fluoride                     | PBSF           | Others      | 3845.09                     | C <sub>4</sub> F <sub>10</sub> O <sub>2</sub> S                                 |  |
| 9  | 1691-99-2  | N-Ethyl-N-(2-hydroxyethyl)perfluorooctanesulfonamide | NET-FOSE       | Sulfonamide | 0                           | C <sub>12</sub> H <sub>10</sub> F <sub>17</sub> N <sub>2</sub> O <sub>3</sub> S |  |

|    |                 |                                                     |                  |             |            |                                                                                  |                                                                                       |
|----|-----------------|-----------------------------------------------------|------------------|-------------|------------|----------------------------------------------------------------------------------|---------------------------------------------------------------------------------------|
| 10 | 32971<br>0-76-1 | 2-(Trifluoromethoxy)ethyl trifluoromethanesulfonate |                  | Ether       | 0.78       | C <sub>4</sub> H <sub>4</sub> F <sub>6</sub><br>O <sub>4</sub> S                 | 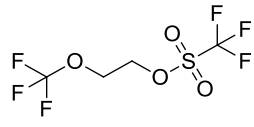   |
| 11 | 375-<br>01-9    | Heptafluorobutanol                                  | HFB              | Alcohol     | 39.35      | C <sub>4</sub> H <sub>3</sub> F <sub>7</sub><br>O                                |    |
| 12 | 375-<br>22-4    | Perfluorobutanoic acid                              | PFBA             | Carboxylate | 5.82       | C <sub>4</sub> H <sub>F</sub> <sub>7</sub> O<br>2                                |    |
| 13 | 74427<br>-22-8  | 2,2-Difluoroethyl triflate                          |                  | Others      | 19.36      | C <sub>3</sub> H <sub>3</sub> F <sub>5</sub><br>O <sub>3</sub> S                 |    |
| 14 | 91463<br>7-49-3 | 2H,2H,3H,3H-Perfluorooctanoic acid                  | 5:3<br>FTCA      | Carboxylate | 0.08       | C <sub>8</sub> H <sub>5</sub> F <sub>11</sub><br>O <sub>2</sub>                  |    |
| 15 | 75712<br>4-72-4 | 4:2 Fluorotelomer sulfonic acid                     | 4:2 FTS          | Sulfonate   | 0.02       | C <sub>6</sub> H <sub>5</sub> F <sub>9</sub><br>O <sub>3</sub> S                 |   |
| 16 | 31506<br>-32-8  | N-Methylperfluorooctane sulfonamide                 | NMe-<br>FOSA     | Sulfonamide | 0          | C <sub>9</sub> H <sub>4</sub> F <sub>11</sub><br>N <sub>2</sub> O <sub>2</sub> S |  |
| 17 | 375-<br>95-1    | Perfluorononanoic acid                              | PFNA             | Carboxylate | 0.07       | C <sub>9</sub> H <sub>F</sub> <sub>17</sub><br>O <sub>2</sub>                    |  |
| 18 | 15242<br>-17-8  | Allyl perfluoroisopropyl ether                      |                  | Ether       | 271.9<br>4 | C <sub>6</sub> H <sub>5</sub> F <sub>7</sub><br>O                                |  |
| 19 | 13485<br>-61-5  | Nonafluoropentanamide                               |                  | Carboxamide | 3.07       | C <sub>5</sub> H <sub>2</sub> F <sub>9</sub><br>NO                               |  |
| 20 | 307-<br>24-4    | Perfluorohexanoic acid                              | PFHxA            | Carboxylate | 1.65       | C <sub>6</sub> H <sub>F</sub> <sub>11</sub><br>O <sub>2</sub>                    |  |
| 21 | 3825-<br>26-1   | Ammonium perfluorooctanoate                         | Ammonium<br>PFOA | Carboxylate | 0.34       | C <sub>8</sub> H <sub>4</sub> F <sub>11</sub><br>5NO <sub>2</sub>                |  |

|    |              |                                                |                              |             |         |                                                                                |  |
|----|--------------|------------------------------------------------|------------------------------|-------------|---------|--------------------------------------------------------------------------------|--|
| 22 | 355-95-3     | 1-Propenylperfluoropropane                     |                              | Others      | 2451.97 | C <sub>6</sub> H <sub>5</sub> F <sub>7</sub>                                   |  |
| 23 | 1763-28-6    | 3,3-Bis(trifluoromethyl)-2-propenoic acid      |                              | Carboxylate | 1.64    | C <sub>5</sub> H <sub>2</sub> F <sub>6</sub> O <sub>2</sub>                    |  |
| 24 | 4151-50-2    | N-Ethylperfluorooctanesulfonamide              | NEt-FOSA                     | Sulfonamide | 0       | C <sub>10</sub> H <sub>6</sub> F <sub>17</sub> N <sub>2</sub> O <sub>2</sub> S |  |
| 25 | 23979-5-57-4 | 2-Vinylperfluorobutane                         |                              | Others      | 2856.11 | C <sub>6</sub> H <sub>3</sub> F <sub>9</sub>                                   |  |
| 26 | 3871-99-6    | Potassium perfluorohexanesulfonate             | Potassium PFH <sub>6</sub> S | Sulfonate   | 0.02    | C <sub>6</sub> F <sub>13</sub> KO <sub>3</sub> S                               |  |
| 27 | 333-36-8     | Flurothyl                                      |                              | Ether       | 226.66  | C <sub>4</sub> H <sub>4</sub> F <sub>6</sub> O                                 |  |
| 28 | 86309-0-89-5 | Perfluoro(4-methoxybutanoic) acid              | PFMOBA                       | Carboxylate | 0.46    | C <sub>5</sub> H <sub>2</sub> F <sub>9</sub> O <sub>3</sub>                    |  |
| 29 | 406-58-6     | 1,1,1,3,3-Pentafluorobutane                    | R365mfc                      | Others      | 2807.55 | C <sub>4</sub> H <sub>5</sub> F <sub>5</sub>                                   |  |
| 30 | 12507-0-38-4 | 3-(Perfluoro-2-butyl)propane-1,2-diol          |                              | Alcohol     | 0.04    | C <sub>7</sub> H <sub>7</sub> F <sub>9</sub> O <sub>2</sub>                    |  |
| 31 | 662-50-0     | Heptafluorobutyramide                          |                              | Carboxamide | 0.14    | C <sub>4</sub> H <sub>2</sub> F <sub>7</sub> NO                                |  |
| 32 | 12930-1-42-4 | 1H,1H,8H,8H-Perfluoro-3,6-dioxaoctane-1,8-diol |                              | Alcohol     | 0       | C <sub>6</sub> H <sub>6</sub> F <sub>8</sub> O <sub>4</sub>                    |  |
| 33 | 31253-34-6   | 2-Aminohexafluoropropan-2-ol                   |                              | Others      | 0.7     | C <sub>3</sub> H <sub>3</sub> F <sub>6</sub> NO                                |  |
| 34 | 33056-2-41-9 | Perfluoro-3,6,9-trioxatridecanoic acid         |                              | Carboxylate | 0.01    | C <sub>10</sub> H <sub>2</sub> F <sub>19</sub> O <sub>5</sub>                  |  |

|    |              |                                        |          |             |        |                                                                 |                                                                                       |
|----|--------------|----------------------------------------|----------|-------------|--------|-----------------------------------------------------------------|---------------------------------------------------------------------------------------|
| 35 | 376-90-9     | Hexafluoroamylene glycol               |          | Alcohol     | 0.12   | C <sub>5</sub> H <sub>6</sub> F <sub>6</sub> O <sub>2</sub>     |    |
| 36 | 424-18-0     | Methyl perfluorohexanoate              | MePFO A  | Ester       | 356.7  | C <sub>7</sub> H <sub>3</sub> F <sub>11</sub> O <sub>2</sub>    |    |
| 37 | 13252-13-6   | Perfluoro-2-methyl-3-oxahecanoic acid  | GenX     | Carboxylate | 0.06   | C <sub>6</sub> H <sub>11</sub> F <sub>11</sub> O <sub>3</sub>   |    |
| 38 | 355-81-7     | Perfluoropentanamide                   |          | Carboxamide | 0.11   | C <sub>5</sub> H <sub>3</sub> F <sub>8</sub> NO                 |    |
| 39 | 13242-4-36-3 | Methyl 2H,2H,3H,3H-perfluoroheptanoate |          | Ester       | 152.32 | C <sub>8</sub> H <sub>7</sub> F <sub>9</sub> O <sub>2</sub>     |    |
| 40 | 3792-02-7    | 4:4 Fluorotelomer alcohol              | 4:4 FTOH | Alcohol     | 8.75   | C <sub>8</sub> H <sub>9</sub> F <sub>9</sub> O                  |    |
| 41 | 2043-47-2    | 4:2 Fluorotelomer alcohol              | 4:2 FTOH | Alcohol     | 47.07  | C <sub>6</sub> H <sub>5</sub> F <sub>9</sub> O                  |   |
| 42 | 375-02-0     | Perfluorobutyraldehyde                 |          | Others      | 2080.3 | C <sub>4</sub> H <sub>7</sub> F <sub>7</sub> O                  |  |
| 43 | 356-42-3     | Pentafluoropropanoic anhydride         | PFPA     | Others      | 534.29 | C <sub>6</sub> F <sub>10</sub> O <sub>3</sub>                   |  |
| 44 | 16370-2-08-7 | Perfluoroisobutyl methyl ether         |          | Ether       | 352.29 | C <sub>5</sub> H <sub>3</sub> F <sub>9</sub> O                  |  |
| 45 | 88349-8-76-8 | Bis(1H,1H-perfluoropropyl)amine        |          | Others      | 7.23   | C <sub>6</sub> H <sub>5</sub> F <sub>11</sub> ON                |  |
| 46 | 1763-23-1    | Perfluorooctanesulfonic acid           | PFOS     | Sulfonate   | 0.01   | C <sub>8</sub> H <sub>17</sub> F <sub>17</sub> O <sub>3</sub> S |  |
| 47 | 356-24-1     | Methyl heptafluorobutyrate             | MeHFB    | Ester       | 288.29 | C <sub>5</sub> H <sub>3</sub> F <sub>7</sub> O <sub>2</sub>     |  |

|    |             |                                            |                |             |         |                                                                               |  |
|----|-------------|--------------------------------------------|----------------|-------------|---------|-------------------------------------------------------------------------------|--|
| 48 | 355-80-6    | 1H,1H,5H-Perfluoropentanol                 |                | Alcohol     | 45.59   | C <sub>5</sub> H <sub>4</sub> F <sub>8</sub> O                                |  |
| 49 | 679-02-7    | 3-(Perfluoropropyl)propanol                |                | Alcohol     | 38.97   | C <sub>6</sub> H <sub>7</sub> F <sub>7</sub> O                                |  |
| 50 | 423-65-4    | 11:1 Fluorotelomer alcohol                 | 11:1 FTOH      | Alcohol     | 0.02    | C <sub>12</sub> H <sub>3</sub> F <sub>23</sub> O                              |  |
| 51 | 813-03-6    | 5H-Octafluoropentanoyl fluoride            |                | Others      | 1572.91 | C <sub>5</sub> H <sub>F</sub> <sub>9</sub> O                                  |  |
| 52 | 56860-81-2  | Difluoromethyl 1H,1H-perfluoropropyl ether |                | Ether       | 263.35  | C <sub>4</sub> H <sub>3</sub> F <sub>7</sub> O                                |  |
| 53 | 1623-05-8   | Heptafluoropropyl trifluorovinyl ether     |                | Ether       | 212.15  | C <sub>5</sub> F <sub>10</sub> O                                              |  |
| 54 | 151772-58-6 | Perfluoro-3,6-dioxaheptanoic acid          | PDHA           | Carboxylate | 1.54    | C <sub>5</sub> H <sub>F</sub> <sub>9</sub> O <sub>4</sub>                     |  |
| 55 | 374-41-4    | Methyl perfluoroethyl ketone               |                | Others      | 801.62  | C <sub>4</sub> H <sub>3</sub> F <sub>5</sub> O                                |  |
| 56 | 243139-64-2 | 3-(Perfluoroisopropyl)-2-propenoic acid    |                | Carboxylate | 1.76    | C <sub>6</sub> H <sub>3</sub> F <sub>7</sub> O <sub>2</sub>                   |  |
| 57 | 29420-49-3  | Potassium perfluorobutanesulfonate         | Potassium PFBS | Sulfonate   | 0.5     | C <sub>4</sub> F <sub>9</sub> KO <sub>3</sub> S                               |  |
| 58 | 355-66-8    | Octafluoroadipamide                        |                | Carboxamide | 0       | C <sub>6</sub> H <sub>4</sub> F <sub>8</sub> N <sub>2</sub> O <sub>2</sub>    |  |
| 59 | 19430-93-4  | 1H,1H,2H-Perfluoro-1-hexene                | PFH            | Others      | 2133.94 | C <sub>6</sub> H <sub>3</sub> F <sub>9</sub>                                  |  |
| 60 | 754-91-6    | Perfluorooctanesulfonamide                 | PFOSA          | Sulfonamide | 0.18    | C <sub>8</sub> H <sub>2</sub> F <sub>17</sub> N <sub>2</sub> O <sub>2</sub> S |  |



|    |              |                                          |            |           |         |                                                             |  |
|----|--------------|------------------------------------------|------------|-----------|---------|-------------------------------------------------------------|--|
| 61 | 1694-30-0    | 3H-Perfluoro-4-hydroxy-3-penten-2-one    |            | Alcohol   | 283.31  | C <sub>5</sub> H <sub>2</sub> F <sub>6</sub> O <sub>2</sub> |  |
| 62 | 374-40-3     | 1-Pentafluoroethylethanol                |            | Alcohol   | 39.48   | C <sub>4</sub> H <sub>5</sub> F <sub>5</sub> O              |  |
| 63 | 678-78-4     | Perfluoroglutaryl difluoride             |            | Others    | 4008.51 | C <sub>5</sub> F <sub>8</sub> O <sub>2</sub>                |  |
| 64 | 678-39-7     | 8:2 Fluorotelomer alcohol                | 8:2 FTOH   | Alcohol   | 0.05    | C <sub>10</sub> H <sub>5</sub> F <sub>17</sub> O            |  |
| 65 | 16370-2-05-4 | Ethyl perfluorobutyl ether               |            | Ether     | 188.89  | C <sub>6</sub> H <sub>5</sub> F <sub>9</sub> O              |  |
| 66 | 77953-71-0   | 3H-Perfluoro-2,2,4,4-tetrahydroxypentane |            | Alcohol   | 0       | C <sub>5</sub> H <sub>5</sub> F <sub>7</sub> O <sub>4</sub> |  |
| 67 | 335-99-9     | Dodecafluoroheptanol                     | H-6:1 FTOH | Alcohol   | 6.31    | C <sub>7</sub> H <sub>4</sub> F <sub>12</sub> O             |  |
| 68 | 355-27-1     | 1H,1H-Perfluoropentylamine               |            | Others    | 151.42  | C <sub>5</sub> H <sub>4</sub> F <sub>9</sub> N              |  |
| 69 | 1767-94-8    | 6H-Perfluorohex-1-ene                    |            | Others    | 358     | C <sub>6</sub> HF <sub>11</sub>                             |  |
| 70 | 647-42-7     | 6:2 Fluorotelomer alcohol                | 6:2 FTOH   | Alcohol   | 4.86    | C <sub>8</sub> H <sub>5</sub> F <sub>13</sub> O             |  |
| 71 | 1619-92-7    | 2-Amino-2H-perfluoropropane              |            | Others    | 133.26  | C <sub>3</sub> H <sub>3</sub> F <sub>6</sub> N              |  |
| 72 | 2648-47-7    | 5H-Perfluoropentanal                     |            | Others    | 915.14  | C <sub>5</sub> H <sub>2</sub> F <sub>8</sub> O              |  |
| 73 | 375-73-5     | Perfluorobutanesulfonic acid             | PFBS       | Sulfonate | 0.5     | C <sub>4</sub> HF <sub>9</sub> O <sub>3</sub> S             |  |

---

|    |          |                        |      |             |      |                                                            |                                                                                     |
|----|----------|------------------------|------|-------------|------|------------------------------------------------------------|-------------------------------------------------------------------------------------|
| 74 | 335-67-1 | Perfluorooctanoic acid | PFOA | Carboxylate | 0.34 | C <sub>8</sub> H <sub>F</sub> <sub>15</sub> O <sub>2</sub> |  |
|----|----------|------------------------|------|-------------|------|------------------------------------------------------------|-------------------------------------------------------------------------------------|

---

<sup>a</sup>Vapor pressures were predicted by Open Structure-activity/property Relationship App (OPERA) developed by the U. S. EPA.

**Table S2:** Among 74 PFAS, 36 ionizable PFAS were subjected for BCF analysis and 25 PFAS were detectable in zebrafish larvae. 31 PFAS from five structural categories prone to metabolism were selected for metabolite profiling with non-targeted analysis.

| <b>ID</b> | <b>CAS</b>  | <b>Ionizable<sup>a</sup></b> | <b>BCF<sup>b</sup></b> | <b>Metabolite profiling<sup>c</sup></b> | <b>Number of metabolite features<sup>d</sup></b> | <b>Representative metabolites<sup>e</sup></b>     |
|-----------|-------------|------------------------------|------------------------|-----------------------------------------|--------------------------------------------------|---------------------------------------------------|
| 1         | 58244-27-2  | N                            | N                      | N                                       | -                                                | -                                                 |
| 2         | 2144-53-8   | N                            | N                      | Y                                       | 1                                                | 6:2 FTOH sulfate<br>(See Figure S9) <sup>f</sup>  |
| 3         | 28523-86-6  | N                            | N                      | N                                       | -                                                | -                                                 |
| 4         | 679-12-9    | Y                            | Y                      | N                                       | -                                                | -                                                 |
| 5         | 1652-63-7   | Y                            | Y                      | Y                                       | 74                                               | Demethylated metabolites, PFOS<br>(See Figure 2C) |
| 6         | 2795-39-3   | Y                            | Y                      | N                                       | -                                                | -                                                 |
| 7         | 55621-21-1  | Y                            | N                      | N                                       | -                                                | -                                                 |
| 8         | 375-72-4    | N                            | N                      | N                                       | -                                                | -                                                 |
| 9         | 1691-99-2   | N                            | N                      | Y                                       | 51                                               | NEt-FOSA                                          |
| 10        | 329710-76-1 | N                            | N                      | N                                       | -                                                | -                                                 |
| 11        | 375-01-9    | Y                            | N                      | Y                                       | 0                                                | -                                                 |
| 12        | 375-22-4    | Y                            | Y                      | N                                       | -                                                | -                                                 |
| 13        | 74427-22-8  | N                            | N                      | N                                       | -                                                | -                                                 |
| 14        | 914637-49-3 | Y                            | Y                      | Y                                       | 5                                                | Taurie conjugates<br>(See Figure 6B)              |
| 15        | 757124-72-4 | Y                            | Y                      | N                                       | -                                                | -                                                 |
| 16        | 31506-32-8  | Y                            | Y                      | Y                                       | 33                                               | PFOS<br>(See Figure S2)                           |
| 17        | 375-95-1    | Y                            | Y                      | N                                       | -                                                | -                                                 |
| 18        | 15242-17-8  | N                            | N                      | N                                       | -                                                | -                                                 |
| 19        | 13485-61-5  | N                            | N                      | Y                                       | 1                                                | PFPeA<br>(See Figure 3)                           |
| 20        | 307-24-4    | Y                            | Y                      | N                                       | -                                                | -                                                 |
| 21        | 3825-26-1   | Y                            | Y                      | N                                       | -                                                | -                                                 |
| 22        | 355-95-3    | N                            | N                      | N                                       | -                                                | -                                                 |

|    |             |   |   |   |    |                                                                                       |
|----|-------------|---|---|---|----|---------------------------------------------------------------------------------------|
| 23 | 1763-28-6   | Y | Y | Y | 0  | -                                                                                     |
| 24 | 4151-50-2   | Y | Y | Y | 72 | PFOS<br>(See Figure S2)                                                               |
| 25 | 239795-57-4 | N | N | N | -  | -                                                                                     |
| 26 | 3871-99-6   | Y | Y | N | -  | -                                                                                     |
| 27 | 333-36-8    | Y | N | N | -  | -                                                                                     |
| 28 | 863090-89-5 | Y | Y | N | -  | -                                                                                     |
| 29 | 406-58-6    | N | N | N | -  | -                                                                                     |
|    |             |   |   |   | 24 | Sulfate, glucuronide<br>and taurine<br>conjugates,<br>carboxylates (See<br>Figure S8) |
| 30 | 125070-38-4 | N | N | Y |    |                                                                                       |
| 31 | 662-50-0    | N | N | Y | 1  | PFBA<br>(See Figure 3)                                                                |
|    |             |   |   |   | 10 | Sulfate and<br>glucuronide<br>conjugate,<br>carboxylates<br>(See Figure 4B)           |
| 32 | 129301-42-4 | Y | Y | Y |    |                                                                                       |
| 33 | 31253-34-6  | N | N | N | -  | -                                                                                     |
| 34 | 330562-41-9 | Y | Y | N | -  | -                                                                                     |
| 35 | 376-90-9    | Y | Y | Y | 1  | Sulfate conjugate                                                                     |
| 36 | 424-18-0    | Y | N | Y | 0  | -                                                                                     |
| 37 | 13252-13-6  | Y | N | N | -  | -                                                                                     |
| 38 | 355-81-7    | Y | Y | Y | 1  | 1H-PFBA<br>(See Figure 3)                                                             |
| 39 | 132424-36-3 | N | N | Y | 46 | Taurine conjugate<br>(See Figure 6D)                                                  |
|    |             |   |   |   | 72 | Sulfate, glucuronide<br>and taurine<br>conjugates,<br>carboxylates (See<br>Figure 4D) |
| 40 | 3792-02-7   | N | N | Y |    |                                                                                       |
|    |             |   |   |   | 28 | Sulfate, glucuronide<br>and taurine<br>conjugates,<br>carboxylates                    |
| 41 | 2043-47-2   | N | N | Y |    |                                                                                       |

|    |             |   |   |   |    |                                                                           |
|----|-------------|---|---|---|----|---------------------------------------------------------------------------|
| 42 | 375-02-0    | N | N | N | -  | -                                                                         |
| 43 | 356-42-3    | N | N | N | -  | -                                                                         |
| 44 | 163702-08-7 | N | N | N | -  | -                                                                         |
| 45 | 883498-76-8 | N | N | N | -  | -                                                                         |
| 46 | 1763-23-1   | Y | Y | N | -  | -                                                                         |
| 47 | 356-24-1    | N | N | Y | 0  | -                                                                         |
| 48 | 355-80-6    | Y | N | Y | 11 | Sulfate, glucuronide conjugates                                           |
| 49 | 679-02-7    | N | N | Y | 57 | Sulfate, glucuronide and taurine conjugates, carboxylates (See Figure S8) |
| 50 | 423-65-4    | Y | N | Y | 9  | Carboxylate, sulfate and glucuronide conjugates                           |
| 51 | 813-03-6    | N | N | N | -  | -                                                                         |
| 52 | 56860-81-2  | N | N | N | -  | -                                                                         |
| 53 | 1623-05-8   | N | N | N | -  | -                                                                         |
| 54 | 151772-58-6 | Y | Y | N | -  | -                                                                         |
| 55 | 374-41-4    | N | N | N | -  | -                                                                         |
| 56 | 243139-64-2 | Y | Y | Y | 1  | Taurine conjugate (See Figure S8)                                         |
| 57 | 29420-49-3  | Y | Y | N | -  | -                                                                         |
| 58 | 355-66-8    | Y | N | Y | 0  | -                                                                         |
| 59 | 19430-93-4  | N | N | N | -  | -                                                                         |
| 60 | 754-91-6    | Y | Y | Y | 6  | PFOS                                                                      |
| 61 | 1694-30-0   | Y | N | Y | 0  | -                                                                         |
| 62 | 374-40-3    | N | N | Y | 0  | -                                                                         |
| 63 | 678-78-4    | N | N | N | -  | -                                                                         |
| 64 | 678-39-7    | N | N | Y | 14 | Sulfate, glucuronide and taurine conjugates,                              |

|    |             |   |   |   |    | carboxylates (See Figure S6)                                     |
|----|-------------|---|---|---|----|------------------------------------------------------------------|
| 65 | 163702-05-4 | N | N | N | -  | -                                                                |
| 66 | 77953-71-0  | Y | N | Y | 0  | -                                                                |
| 67 | 335-99-9    | N | N | Y | 3  | Sulfate, glucuronide conjugates and carboxylates (See Figure S7) |
| 68 | 355-27-1    | Y | N | N | -  | -                                                                |
| 69 | 1767-94-8   | N | N | N | -  | -                                                                |
| 70 | 647-42-7    | N | N | Y | 12 | Sulfate, glucuronide and taurine conjugates, carboxylates        |
| 71 | 1619-92-7   | N | N | N | -  | -                                                                |
| 72 | 2648-47-7   | N | N | N | -  | -                                                                |
| 73 | 375-73-5    | Y | Y | N | -  | -                                                                |
| 74 | 335-67-1    | Y | Y | N | -  | -                                                                |

<sup>a</sup> The 36 ionizable PFAS detectable by LC-MS were highlighted as ‘Y’.

<sup>b</sup> The 25 PFAS detectable in zebrafish larvae for BCF analysis were highlighted as ‘Y’.

<sup>c</sup> The 31 PFAS selected for metabolite profiling were highlighted as ‘Y’.

<sup>d</sup> The number of metabolite features detected for each PFAS. Note that the number of metabolite features might be overestimated for some PFASs as low-abundance features might be attributed to impurities of standards. Thus, high abundance metabolites were selected for structure prediction as described in the method section.

<sup>e</sup> The representative metabolites with high abundances.

<sup>f</sup> The structures of representative metabolites were shown in corresponding figures.

**Table S3:** Summary of 28 PFAS that were detectable in zebrafish larvae, including concentrations in medium ( $\mu\text{M}$ ), recovery (%) and method detection limit (MDL) (ng/g).

| ID | CAS          | Preferred Name                             | Abbreviation   | Category     | Concentration in medium ( $\mu\text{M}$ ) |                   | Recovery (%)      | MDL (ng/g) |
|----|--------------|--------------------------------------------|----------------|--------------|-------------------------------------------|-------------------|-------------------|------------|
|    |              |                                            |                |              | 5 $\mu\text{M}$                           | 0.5 $\mu\text{M}$ |                   |            |
| 4  | 679-12-9     | 4H-Perfluorobutanoic acid                  | H-PFBA         | Carboxylates | 3.8 $\pm$ 0.09                            | 0.31 $\pm$ 0.02   | 95.86 $\pm$ 2.73  | 0.4        |
| 5  | 1652-63-7    | Perfluorooctanesulfonamido ammonium iodide | PFOSAmS        | Sulfonamides | 4.51 $\pm$ 0.08                           | 0.36 $\pm$ 0.01   | 94.96 $\pm$ 1.79  | 0.35       |
| 6  | 2795-39-3    | Potassium perfluorooctanesulfonate         | Potassium PFOS | Sulfonates   | 3.35 $\pm$ 0.03                           | 0.32 $\pm$ 0.01   | 87.45 $\pm$ 3.88  | 0.1        |
| 12 | 375-22-4     | Perfluorobutanoic acid                     | PFBA           | Carboxylates | 3.13 $\pm$ 0.08                           | 0.31 $\pm$ 0.03   | 90.73 $\pm$ 17.88 | 0.58       |
| 14 | 91463-7-49-3 | 2H,2H,3H,3H-Perfluorooctanoic acid         | 5:3 FTCA       | Carboxylates | 4.03 $\pm$ 0.2                            | 0.48 $\pm$ 0.02   | 99.13 $\pm$ 3.49  | 0.01       |
| 15 | 75712-4-72-4 | 4:2 Fluorotelomer sulfonic acid            | 4:2 FTS        | Sulfonates   | 4.21 $\pm$ 0.07                           | 0.31 $\pm$ 0.02   | 86.98 $\pm$ 1.64  | 0.1        |
| 16 | 31506-32-8   | N-Methylperfluorooctanesulfonamide         | NMe-FOSA       | Sulfonamides | 3.76 $\pm$ 0.49                           | 0.35 $\pm$ 0.01   | 92.89 $\pm$ 10.35 | 0.74       |

|    |              |                                                |                 |              |                 |                 |                  |      |
|----|--------------|------------------------------------------------|-----------------|--------------|-----------------|-----------------|------------------|------|
| 17 | 375-95-1     | Perfluorooctanoic acid                         | PFNA            | Carboxylates | $3.65 \pm 0.09$ | $0.39 \pm 0.01$ | $93.89 \pm 6.7$  | 0.07 |
| 19 | 13485-61-5   | Nonafluoropentanamide                          |                 | Amides       | $4.77 \pm 0.24$ | $0.29 \pm 0.05$ | $85.02 \pm 3.69$ | 1.72 |
| 20 | 307-24-4     | Perfluorohexanoic acid                         | PFHxA           | Carboxylates | $4.51 \pm 0.11$ | $0.34 \pm 0.01$ | $86.28 \pm 5.65$ | 0.11 |
| 21 | 3825-26-1    | Ammonium perfluorooctanoate                    | Ammonium PFOA   | Carboxylates | $3.67 \pm 0.06$ | $0.38 \pm 0.01$ | $87.73 \pm 2.27$ | 0.1  |
| 23 | 1763-28-6    | 3,3-Bis(trifluoromethyl)-2-propenoic acid      |                 | Carboxylates | $3.07 \pm 0.07$ | $0.33 \pm 0.07$ | $75.12 \pm 9.59$ | 0.42 |
| 24 | 4151-50-2    | N-Ethylperfluorooctanesulfonamide              | NET-FOSA        | Sulfonamides | $4.01 \pm 0.18$ | $0.44 \pm 0.01$ | $79.1 \pm 2.79$  | 0.09 |
| 26 | 3871-99-6    | Potassium perfluorohexanesulfonate             | Potassium PFHxS | Sulfonates   | $4.37 \pm 0.05$ | $0.33 \pm 0.03$ | $94.27 \pm 4.8$  | 0.28 |
| 28 | 86309-0-89-5 | Perfluoro(4-methoxybutanoic) acid              | PFMOBA          | Ethers       | $4.12 \pm 0.09$ | $0.31 \pm 0.01$ | $97.91 \pm 8.33$ | 0.09 |
| 31 | 662-50-0     | Heptafluorobutyramide                          |                 | Amides       | $4.79 \pm 0.18$ | $0.41 \pm 0.04$ | $86.91 \pm 0.9$  | 1.39 |
| 32 | 12930-1-42-4 | 1H,1H,8H,8H-Perfluoro-3,6-dioxaoctane-1,8-diol |                 | Alcohols     | $3.2 \pm 0.12$  | $0.39 \pm 0.03$ | $81.14 \pm 4.67$ | 0.07 |



|    |                     |                                                            |                    |                  |                 |                 |                   |      |
|----|---------------------|------------------------------------------------------------|--------------------|------------------|-----------------|-----------------|-------------------|------|
| 34 | 33056<br>2-41-<br>9 | Perfluoro-<br>3,6,9-<br>trioxatridec<br>anoic acid         |                    | Ethers           | $4.16 \pm 0.45$ | $0.34 \pm 0.02$ | $82.46 \pm 11.1$  | 1.3  |
| 38 | 355-<br>81-7        | Perfluorop<br>entanamide                                   |                    | Amides           | $4.41 \pm 0.67$ | $0.29 \pm 0.01$ | $75.25 \pm 8.32$  | 0.2  |
| 46 | 1763-<br>23-1       | Perfluoroo<br>ctanesulfon<br>ic acid                       | PFOS               | Sulfonates       | $3.46 \pm 0.05$ | $0.25 \pm 0.06$ | $71.49 \pm 2.33$  | 0.09 |
| 48 | 355-<br>80-6        | 1H,1H,5H-<br>Perfluorop<br>entanol                         |                    | Alcohols         | $5.67 \pm 0.25$ | $0.62 \pm 0.04$ | $111.16 \pm 7.44$ | 0.04 |
| 50 | 423-<br>65-4        | 11:1<br>Fluorotelo<br>mer<br>alcohol                       | 11:1<br>FTOH       | Alcohols         | $4.89 \pm 0.78$ | $0.56 \pm 0.01$ | $104.87 \pm 8.15$ | 0.04 |
| 54 | 15177<br>2-58-<br>6 | Perfluoro-<br>3,6-<br>dioxahapta<br>noic acid              | PDHA               | Ethers           | $3.71 \pm 0.3$  | $0.33 \pm 0.02$ | $77.02 \pm 10.05$ | 0.03 |
| 56 | 24313<br>9-64-<br>2 | 3-<br>(Perfluoroi<br>sopropyl)-<br>2-<br>propenoic<br>acid |                    | Carboxyla<br>tes | $3.39 \pm 0.08$ | $0.37 \pm 0.01$ | $78.08 \pm 2.49$  | 0.03 |
| 57 | 29420<br>-49-3      | Potassium<br>perfluorob<br>utanesulfo<br>nate              | Potassiu<br>m PFBS | Sulfonates       | $4.49 \pm 0.5$  | $0.32 \pm 0.05$ | $77.75 \pm 2.42$  | 0.32 |
| 58 | 355-<br>66-8        | Octafluoro<br>adipamide                                    |                    | Amides           | $3.39 \pm 0.36$ | $0.25 \pm 0.03$ | $82.66 \pm 4.7$   | 0.82 |
| 60 | 754-<br>91-6        | Perfluoroo<br>ctanesulfon<br>amide                         | PFOSA              | Sulfonami<br>des | $4.16 \pm 0.08$ | $0.4 \pm 0.01$  | $93.96 \pm 4.28$  | 0.46 |
| 61 | 1694-<br>30-0       | 3H-<br>Perfluoro-<br>4-hydroxy-<br>3-penten-<br>2-one      |                    | Alcohols         | $3.61 \pm 0.18$ | $0.34 \pm 0.07$ | $92.81 \pm 2.78$  | 0.01 |

---

|    |          |                              |      |              |                 |                 |                 |      |
|----|----------|------------------------------|------|--------------|-----------------|-----------------|-----------------|------|
| 73 | 375-73-5 | Perfluorobutanesulfonic acid | PFBS | Sulfonates   | $4.76 \pm 0.17$ | $0.36 \pm 0.03$ | $78.51 \pm 4.6$ | 0.29 |
| 74 | 335-67-1 | Perfluorooctanoic acid       | PFOA | Carboxylates | $3.94 \pm 0.08$ | $0.42 \pm 0.03$ | $77.49 \pm 1.8$ | 0.09 |

---

**Table S4:** Bioaccumulations and toxicities of 74 PFAS in early life stage (ELS) of zebrafish. Bioconcentration factors (BCFs, L/kg) are shown for PFAS at both 0.5µM and 5µM. Mortality was only shown for higher concentrations of 5 µM, N=12-20.

| ID | CAS        | Category    | Preferred Name                             | Abbreviation   | BCF 0.5µM              | BCF 5µM   | Mortality <sup>d</sup> (%) | p-value |
|----|------------|-------------|--------------------------------------------|----------------|------------------------|-----------|----------------------------|---------|
| 1  | 58244-27-2 | Ether       | tris(Trifluoroethoxy)methane               |                | - <sup>a</sup>         | -         | 0                          | 0.5984  |
| 2  | 2144-53-8  | Ester       | 6:2 Fluorotelomer methacrylate             | 6:2 FTMAC      | -                      | -         | 0                          | 0.4263  |
| 3  | 28523-86-6 | Ether       | Sevoflurane                                |                | -                      | -         | 1.1                        | 0.857   |
| 4  | 679-12-9   | Carboxylate | 4H-Perfluorobutanoic acid                  | H-PFBA         | 3.4 ± 1.4 <sup>b</sup> | 1.9 ± 0.4 | 0                          | 0.5984  |
| 5  | 1652-63-7  | Sulfonamide | Perfluorooctanesulfonamide ammonium iodide | PFOSAmS        | 48 ± 6.0               | 56 ± 16   | 2.2                        | 0.9968  |
| 6  | 2795-39-3  | Sulfonate   | Potassium perfluorooctanesulfonate         | Potassium PFOS | 288 ± 99               | 82 ± 9.2  | 2.2                        | 0.9969  |
| 7  | 55621-21-1 | Carboxylate | Perfluoro-3,6-dioxaoctane-1,8-dioic acid   |                | ND <sup>c</sup>        | ND        | 1.1                        | 0.857   |
| 8  | 375-72-4   | Others      | Perfluorobutanesulfonyl fluoride           | PBSF           | -                      | -         | 2.2                        | 0.9969  |

|    |             |             |                                                      |          |           |            |                                |                          |
|----|-------------|-------------|------------------------------------------------------|----------|-----------|------------|--------------------------------|--------------------------|
| 9  | 1691-99-2   | Sulfonamide | N-Ethyl-N-(2-hydroxyethyl)perfluorooctanesulfonamide | NEt-FOSE | -         | -          | 1.1                            | 0.857                    |
| 10 | 329710-76-1 | Ether       | 2-(Trifluoromethoxy)ethyl trifluoromethanesulfonate  |          | -         | -          | 0                              | 0.5984                   |
| 11 | 375-01-9    | Alcohol     | Heptafluorobutanol                                   | HFB      | ND        | ND         | 1.1                            | 0.857                    |
| 12 | 375-22-4    | Carboxylate | Perfluorobutanoic acid                               | PFBA     | 2.6 ± 1.3 | 1.0 ± 0.28 | 4.4                            | 0.6892                   |
| 13 | 74427-22-8  | Others      | 2,2-Difluoroethyl triflate                           |          | -         | -          | 2.2                            | 0.9968                   |
| 14 | 914637-49-3 | Carboxylate | 2H,2H,3H,3H-Perfluorooctanoic acid                   | 5:3 FTCA | 6.7 ± 1.0 | 8.7 ± 2.1  | 1.1                            | 0.857                    |
| 15 | 757124-72-4 | Sulfonate   | 4:2 Fluorotelomer sulfonic acid                      | 4:2 FTS  | 5.7 ± 1.0 | 2.5 ± 0.13 | 0                              | 0.5984                   |
| 16 | 31506-32-8  | Sulfonamide | N-Methylperfluorooctanesulfonamide                   | NMe-FOSA | 292 ± 56  | 89 ± 9.4   | <b><u>34.4<sup>e</sup></u></b> | <b><u>&lt;0.0001</u></b> |
| 17 | 375-95-1    | Carboxylate | Perfluorononanoic acid                               | PFNA     | 153 ± 6.0 | 73 ± 6.9   | 1.1                            | 0.857                    |

|    |                 |                 |                                                          |                    |               |                |     |        |
|----|-----------------|-----------------|----------------------------------------------------------|--------------------|---------------|----------------|-----|--------|
| 18 | 15242<br>-17-8  | Ether           | Allyl<br>perfluoroisop<br>ropyl ether                    |                    | -             | -              | 3.3 | 0.9238 |
| 19 | 13485<br>-61-5  | Carboxam<br>ide | Nonafluorop<br>entanamide                                |                    | -             | -              | 1.1 | 0.857  |
| 20 | 307-<br>24-4    | Carboxyla<br>te | Perfluorohex<br>anoic acid                               | PFHxA              | 6.6 ±<br>1.1  | 3.5 ±<br>0.64  | 0   | 0.9968 |
| 21 | 3825-<br>26-1   | Carboxyla<br>te | Ammonium<br>perfluoroocta<br>noate                       | Ammonium<br>PFOA   | 43 ±<br>4.5   | 21 ±<br>0.42   | 0   | 0.5984 |
| 22 | 355-<br>95-3    | Others          | 1-<br>Propenylperf<br>luoropropane                       |                    | -             | -              | 3.3 | 0.9238 |
| 23 | 1763-<br>28-6   | Carboxyla<br>te | 3,3-<br>Bis(trifluoro<br>methyl)-2-<br>propenoic<br>acid |                    | 1.8 ±<br>0.98 | 0.69 ±<br>0.29 | 2.2 | 0.4256 |
| 24 | 4151-<br>50-2   | Sulfonami<br>de | N-<br>Ethylperfluor<br>ooctanesulfo<br>namide            | NEt-FOSA           | 28 ±<br>7.8   | 24 ± 2.9       | 3.3 | 0.9238 |
| 25 | 23979<br>5-57-4 | Others          | 2-<br>Vinylperflu<br>robutane                            |                    | -             | -              | 1.1 | 0.857  |
| 26 | 3871-<br>99-6   | Sulfonate       | Potassium<br>perfluorohex<br>anesulfonate                | Potassium<br>PFHxS | 55 ±<br>6.3   | 30 ±<br>0.71   | 3.3 | 0.9238 |
| 27 | 333-<br>36-8    | Ether           | Flurothyl                                                |                    | ND            | ND             | 1.1 | 0.5984 |

|    |                 |             |                                                |         |               |               |     |        |
|----|-----------------|-------------|------------------------------------------------|---------|---------------|---------------|-----|--------|
| 28 | 86309<br>0-89-5 | Carboxylate | Perfluoro(4-methoxybutanoic) acid              | PFMOMA  | 5.2 ±<br>3.2  | 1.4 ±<br>0.17 | 1.1 | 0.857  |
| 29 | 406-<br>58-6    | Others      | 1,1,1,3,3-Pentafluorobutane                    | R365mfc | -             | -             | 3.3 | 0.9243 |
| 30 | 12507<br>0-38-4 | Alcohol     | 3-(Perfluoro-2-butyl)propane-1,2-diol          |         | -             | -             | 0   | 0.5984 |
| 31 | 662-<br>50-0    | Carboxamide | Heptafluorobutyramide                          |         | -             | -             | 2.2 | 0.9968 |
| 32 | 12930<br>1-42-4 | Alcohol     | 1H,1H,8H,8H-Perfluoro-3,6-dioxaoctane-1,8-diol |         | 5.9 ±<br>0.08 | 8.4 ±<br>1.1  | 3.3 | 0.9969 |
| 33 | 31253<br>-34-6  | Others      | 2-Aminohexafluoropropan-2-ol                   |         | -             | -             | 7.8 | 0.1014 |
| 34 | 33056<br>2-41-9 | Carboxylate | Perfluoro-3,6,9-trioxatridecanoic acid         |         | 585 ±<br>174  | 93 ± 19       | 10  | 0.9243 |
| 35 | 376-<br>90-9    | Alcohol     | Hexafluoroamine glycol                         |         | 1.6 ±<br>0.46 | 1.1 ±<br>0.09 | 0   | 0.5984 |
| 36 | 424-<br>18-0    | Ester       | Methyl perfluorohexanoate                      | MePFOA  | ND            | ND            | 4.4 | 0.6892 |

|    |             |             |                                       |          |            |            |             |                   |
|----|-------------|-------------|---------------------------------------|----------|------------|------------|-------------|-------------------|
| 37 | 13252-13-6  | Carboxylate | Perfluoro-2-methyl-3-oxahexanoic acid | GenX     | ND         | ND         | 1.1         | 0.857             |
| 38 | 355-81-7    | Carboxamide | Perfluoropentanamide                  |          | 1.8 ± 0.31 | 1.9 ± 0.66 | <b>17.8</b> | <b>&lt;0.0001</b> |
| 39 | 132424-36-3 | Ester       | Methyl 2H,2H,3H,3H-perfluorheptanoate |          | -          | -          | 1.1         | 0.9238            |
| 40 | 3792/2/7    | Alcohol     | 4:4 Fluorotelomer alcohol             | 4:4 FTOH | -          | -          | 0           | 0.5984            |
| 41 | 2043-47-2   | Alcohol     | 4:2 Fluorotelomer alcohol             | 4:2 FTOH | -          | -          | 0           | 0.1014            |
| 42 | 375-02-0    | Others      | Perfluorobutyraldehyde                |          | -          | -          | 0           | 0.5984            |
| 43 | 356-42-3    | Others      | Pentafluoropropanoic anhydride        | PFPA     | -          | -          | 5.6         | 0.4263            |
| 44 | 163702-08-7 | Ether       | Perfluorobutyl methyl ether           |          | -          | -          | 1.1         | 0.857             |
| 45 | 883498-76-8 | Others      | Bis(1H,1H-perfluoropropyl)amine       |          | -          | -          | 2.2         | 0.857             |
| 46 | 1763-23-1   | Sulfonate   | Perfluorooctanesulfonic acid          | PFOS     | 271 ± 69   | 91 ± 10    | 2.2         | 0.9968            |

|    |              |             |                                        |           |            |             |     |        |
|----|--------------|-------------|----------------------------------------|-----------|------------|-------------|-----|--------|
| 47 | 356-24-1     | Ester       | Methyl heptafluorobutyrate             | MeHFB     | -          | -           | 0   | 0.5984 |
| 48 | 355-80-6     | Alcohol     | 1H,1H,5H-Perfluoropentanol             |           | ND         | ND          | 1.1 | 0.857  |
| 49 | 679-02-7     | Alcohol     | 3-(Perfluoropropyl)propanol            |           | -          | -           | 1.1 | 0.857  |
| 50 | 423-65-4     | Alcohol     | 11:1 Fluorotelomer alcohol             | 11:1 FTOH | ND         | 1.7 ± 0.23  | 1.1 | 0.857  |
| 51 | 813-03-6     | Others      | 5H-Octafluoropentanoyl fluoride        |           | ND         | 0.75 ± 0.15 | 0   | 0.5984 |
| 52 | 56860-81-2   | Ether       | Difluoromethyl 1H,1H-perfluoropropyl   |           | -          | -           | 2.2 | 0.9968 |
| 53 | 1623-05-8    | Ether       | Heptafluoropropyl trifluorovinyl ether |           | -          | -           | 2.2 | 0.5984 |
| 54 | 15177-2-58-6 | Carboxylate | Perfluoro-3,6-dioxaheptanoic acid      | PDHA      | 2.1 ± 0.27 | 2.0 ± 0.40  | 2.2 | 0.9968 |
| 55 | 374-41-4     | Others      | Methyl perfluoroethyl ketone           |           | -          | -           | 2.2 | 0.1039 |



|    |                 |             |                                             |                |              |               |            |                   |
|----|-----------------|-------------|---------------------------------------------|----------------|--------------|---------------|------------|-------------------|
| 56 | 24313<br>9-64-2 | Carboxylate | 3-<br>(Perfluoroisopropyl)-2-propenoic acid |                | 2.6 ±<br>0.1 | 1.6 ±<br>0.21 | 4.4        | 0.6892            |
| 57 | 29420<br>-49-3  | Sulfonate   | Potassium perfluorobutanesulfonate          | Potassium PFBS | 4.0 ±<br>0.9 | 3.0 ±<br>0.54 | 2.2        | 0.9968            |
| 58 | 355-<br>66-8    | Carboxamide | Octafluoroadipamide                         |                | ND           | ND            | 6.7        | 0.2238            |
| 59 | 19430<br>-93-4  | Others      | 1H,1H,2H-Perfluoro-1-hexene                 | PFH            | -            | -             | 4.4        | 0.6892            |
| 60 | 754-<br>91-6    | Sulfonamide | Perfluorooctanesulfonamide                  | PFOSA          | 501 ±<br>19  | -             | <b>100</b> | <b>&lt;0.0001</b> |
| 61 | 1694-<br>30-0   | Alcohol     | 3H-Perfluoro-4-hydroxy-3-penten-2-one       |                | ND           | 7.7 ±<br>2.3  | 4.4        | 0.6884            |
| 62 | 374-<br>40-3    | Alcohol     | 1-Pentafluoroethyl ethanol                  |                | -            | -             | 6.7        | 0.2238            |
| 63 | 678-<br>78-4    | Others      | Perfluoroglutaryl difluoride                |                | -            | -             | 5.6        | 0.4256            |
| 64 | 678-<br>39-7    | Alcohol     | 8:2 Fluorotelomer alcohol                   | 8:2 FTOH       | -            | -             | 3.3        | 0.9238            |
| 65 | 16370<br>2-05-4 | Ether       | Ethyl perfluorobutyl ether                  |                | -            | -             | 0          | 0.5984            |

|         |            |             |                                           |            |            |            |     |        |
|---------|------------|-------------|-------------------------------------------|------------|------------|------------|-----|--------|
| 66      | 77953-71-0 | Alcohol     | 3H-Perfluoro-2,2,4,4-tetrahydroxy pentane |            | ND         | ND         | 1.1 | 0.857  |
| 67      | 335-99-9   | Alcohol     | Dodecafluorohexanol                       | H-6:1 FTOH | -          | -          | 0   | 0.5984 |
| 68      | 355-27-1   | Others      | 1H,1H-Perfluoropentylamine                |            | ND         | ND         | 1.1 | 0.857  |
| 69      | 1767-94-8  | Others      | 6H-Perfluorohex-1-ene                     |            | -          | -          | 0   | 0.5984 |
| 70      | 647-42-7   | Alcohol     | 6:2 Fluorotelomer alcohol                 | 6:2 FTOH   | -          | -          | 0   | 0.5984 |
| 71      | 1619-92-7  | Others      | 2-Amino-2H-perfluoropropane               |            | -          | -          | 3.3 | 0.9238 |
| 72      | 2648-47-7  | Others      | 5H-Perfluoropentanol                      |            | -          | -          | 3.3 | 0.9238 |
| 73      | 375-73-5   | Sulfonate   | Perfluorobutanesulfonic acid              | PFBS       | 2.9 ± 0.36 | 2.8 ± 0.47 | 5.6 | 0.4256 |
| 74      | 335-67-1   | Carboxylate | Perfluorooctanoic acid                    | PFOA       | 32 ± 4.4   | 17 ± 3.2   | 4.4 | 0.6892 |
| Control |            |             |                                           |            | -          | -          | 2.4 |        |

<sup>a</sup> BCF was not determined as these PFAS were not ionizable under ESI as determined by high resolution mass spectrometry.

<sup>b</sup> The average and standard deviations of BCFs across three replicates. Corresponding to Figure S1.

<sup>c</sup> PFAS were not detected in ELS zebrafish.

<sup>d</sup> Toxicities were only shown for high dose treatment (5 µM) while no significant lethal effects were observed at 0.5 µM.

<sup>e</sup> Significant toxicities were labeled as bold. One-way analysis of variance (ANOVA) with Dunnett test was employed for the statistical test,  $p < 0.05$  were deemed statistically significant.

**Table S5:** Information of nine PFAS considered as high affinity liver fatty acid binding protein (L-FABP) ligands ( $K_d < 20 \mu\text{M}$ ) (Yang et al. 2020)

| ID | Preferred Name                             | Abbreviations                   | CAS         | Molecular fomula                                          | Kd ( $\mu\text{M}$ ) |
|----|--------------------------------------------|---------------------------------|-------------|-----------------------------------------------------------|----------------------|
| 6  | Potassium FTCA<br>perfluorooctanesulfonate | Potassium<br>PFOS               | 2795-39-3   | $\text{C}_8\text{F}_{17}\text{KO}_3\text{S}$              | 8.10                 |
| 46 | Perfluorooctanesulfonic acid               | PFOS                            | 1763-23-1   | $\text{C}_8\text{HF}_{17}\text{O}_3\text{S}$              | 8.10                 |
| 26 | Potassium<br>perfluorohexanesulfonate      | Potassium<br>PFH <sub>x</sub> S | 3871-99-6   | $\text{C}_6\text{F}_{13}\text{KO}_3\text{S}$              | 11.2                 |
| 60 | Perfluorooctanesulfonamide                 | PFOSA                           | 754-91-6    | $\text{C}_8\text{H}_2\text{F}_{17}\text{NO}_2\text{S}$    | 5.87                 |
| 21 | Ammonium perfluorooctanoate                | Ammonium<br>PFOA                | 3825-26-1   | $\text{C}_8\text{H}_4\text{F}_{15}\text{NO}_2$            | 18.7                 |
| 74 | Perfluorooctanoic acid                     | PFOA                            | 335-67-1    | $\text{C}_8\text{HF}_{15}\text{O}_2$                      | 18.7                 |
| 34 | Perfluoro-3,6,9-trioxatridecanoic<br>acid  | long-chain<br>PFCA              | 330562-41-9 | $\text{C}_{10}\text{HF}_{19}\text{O}_5$                   | 8.22                 |
| 17 | Perfluorononanoic acid                     | PFNA                            | 375-95-1    | $\text{C}_9\text{HF}_{17}\text{O}_2$                      | 4.30                 |
| 24 | N-<br>Ethylperfluorooctanesulfonamide      | NEt-FOSA                        | 4151-50-2   | $\text{C}_{10}\text{H}_6\text{F}_{17}\text{NO}_2\text{S}$ | 16.5                 |

**Table S6:** Peak intensities of metabolites detected in zebrafish larvae exposed to 15 fluorotelomer alcohols (FTOHs) at 5  $\mu$ M and 120 hpf.

| FTOH                                       | Sulfate                       | Glucuronide                  | Carboxylates                 | Shortened carboxylates <sup>a</sup> | Cysteine adduct              | Taurine                       |
|--------------------------------------------|-------------------------------|------------------------------|------------------------------|-------------------------------------|------------------------------|-------------------------------|
| <b>FTOHs with 1 hydrocarbon</b>            |                               |                              |                              |                                     |                              |                               |
| 1H-4:1 FTOH ( <b>48</b> )                  | 3.3 $\times$ 10 <sup>5b</sup> | 2.3 $\times$ 10 <sup>5</sup> | $\times$ <sup>c</sup>        | $\times$                            | $\times$                     | $\times$                      |
| 1H-6:1 FTOH ( <b>67</b> )                  | 4.5 $\times$ 10 <sup>6</sup>  | 2.7 $\times$ 10 <sup>7</sup> | 4.2 $\times$ 10 <sup>6</sup> | $\times$                            | $\times$                     | $\times$                      |
| <b>35</b>                                  | 1.7 $\times$ 10 <sup>5</sup>  | $\times$                     | $\times$                     | $\times$                            | $\times$                     | $\times$                      |
| 11:1 FTOH ( <b>50</b> )                    | 3.2 $\times$ 10 <sup>5</sup>  | 1.9 $\times$ 10 <sup>6</sup> | 8.2 $\times$ 10 <sup>6</sup> | $\times$                            | $\times$                     | $\times$                      |
| <b>32</b>                                  | 3.4 $\times$ 10 <sup>6</sup>  | 1.9 $\times$ 10 <sup>6</sup> | 6.4 $\times$ 10 <sup>6</sup> | $\times$                            | $\times$                     | $\times$                      |
| 3:1 FTOH ( <b>11</b> )                     | $\times$                      | $\times$                     | $\times$                     | $\times$                            | $\times$                     | $\times$                      |
| <b>FTOHs with 2 hydrocarbons</b>           |                               |                              |                              |                                     |                              |                               |
| 4:2 FTOH ( <b>41</b> )                     | 1.0 $\times$ 10 <sup>6</sup>  | 1.2 $\times$ 10 <sup>6</sup> | 8.3 $\times$ 10 <sup>5</sup> | 1.9 $\times$ 10 <sup>6</sup>        | $\times$                     | 4.2 $\times$ 10 <sup>5</sup>  |
| 6:2 FTOH ( <b>70</b> )                     | 1.3 $\times$ 10 <sup>7</sup>  | 2.3 $\times$ 10 <sup>6</sup> | $\times$                     | 1.0 $\times$ 10 <sup>6d</sup>       | 5.6 $\times$ 10 <sup>4</sup> | 1.0 $\times$ 10 <sup>5e</sup> |
| 8:2 FTOH ( <b>64</b> )                     | 6.3 $\times$ 10 <sup>7</sup>  | 1.9 $\times$ 10 <sup>7</sup> | $\times$                     | 2.3 $\times$ 10 <sup>6</sup>        | 2.9 $\times$ 10 <sup>5</sup> | 1.4 $\times$ 10 <sup>6</sup>  |
| <b>FTOHs with more than 2 hydrocarbons</b> |                               |                              |                              |                                     |                              |                               |
| 4:4 FTOH ( <b>40</b> )                     | 4.2 $\times$ 10 <sup>6</sup>  | 4.6 $\times$ 10 <sup>6</sup> | 5.4 $\times$ 10 <sup>5</sup> | 2.0 $\times$ 10 <sup>6</sup>        | 3.4 $\times$ 10 <sup>5</sup> | 6.9 $\times$ 10 <sup>7</sup>  |
| 3:3 FTOH ( <b>49</b> )                     | 1.1 $\times$ 10 <sup>6</sup>  | 4.6 $\times$ 10 <sup>6</sup> | 1.5 $\times$ 10 <sup>6</sup> | 5.1 $\times$ 10 <sup>4</sup>        | 9.4 $\times$ 10 <sup>5</sup> | 1.8 $\times$ 10 <sup>8</sup>  |
| <b>30</b>                                  | 2.2 $\times$ 10 <sup>7</sup>  | 5.0 $\times$ 10 <sup>5</sup> | 2.9 $\times$ 10 <sup>6</sup> | 1.3 $\times$ 10 <sup>6</sup>        | $\times$                     | 1.6 $\times$ 10 <sup>6</sup>  |
| <b>Other FTOHs</b>                         |                               |                              |                              |                                     |                              |                               |
| <b>61</b>                                  | $\times$                      | $\times$                     | $\times$                     | $\times$                            | $\times$                     | $\times$                      |
| <b>62</b>                                  | $\times$                      | $\times$                     | $\times$                     | $\times$                            | $\times$                     | $\times$                      |
| <b>66</b>                                  | $\times$                      | $\times$                     | $\times$                     | $\times$                            | $\times$                     | $\times$                      |

<sup>a</sup> Carboxylates with shorter carbon chain length, via  $\beta$ -oxidation.

<sup>b</sup> The average peak intensities of metabolites from three biological replicates.

<sup>c</sup> Not detected.

<sup>d</sup> Peak intensities were only shown for the most abundant carboxylates, *e.g.*, 5:3 FTUCA.

<sup>e</sup> Taurine conjugates were detected for shortened carboxylates, *e.g.*, 5:3 FTUCA.

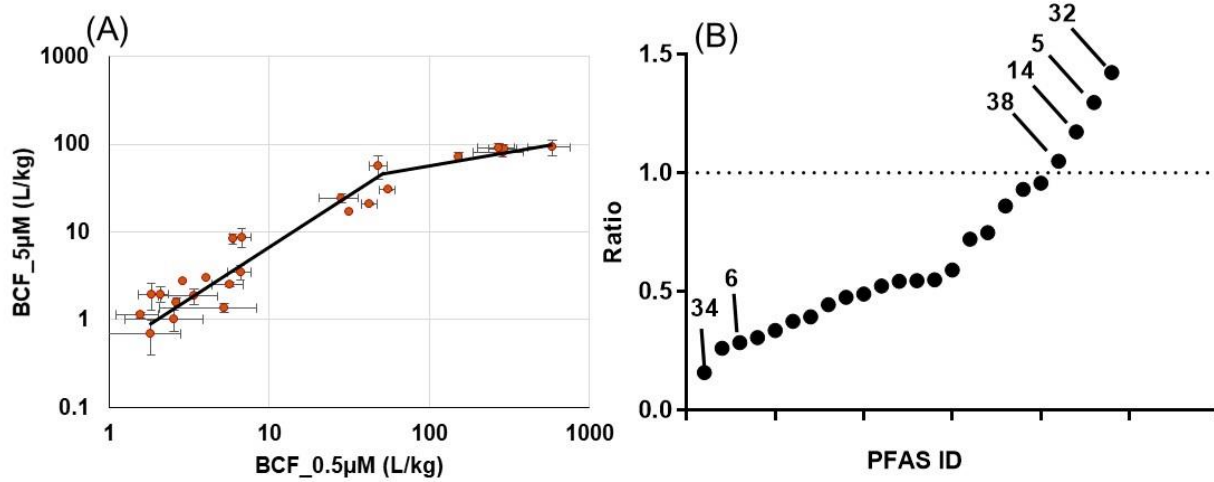

**Figure S1:** Relationships between BCFs and exposure concentrations. (A) Comparison of the BCFs of PFAS in zebrafish larvae at 120 hpf, at 0.5 µM and 5 µM. Dots represent mean  $\pm$  SD (n=3). (B) The ratios of BCFs at 5 µM to 0.5 µM. Notes: PFAS, per- and polyfluoroalkyl substances; BCFs, bioconcentration factor. The summary data can be found in Table S3. The lines from panel A represent stepwise linear trends.

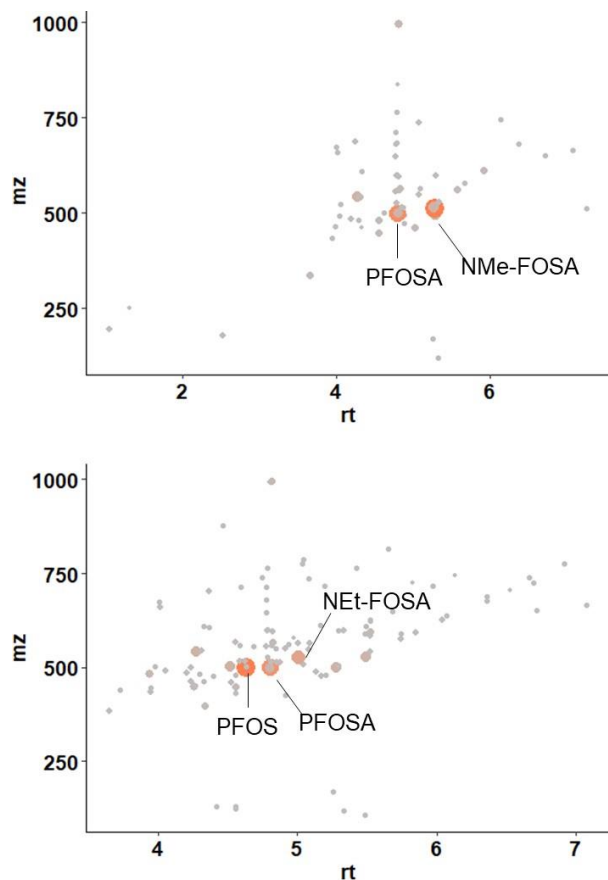

**Figure S2:** Metabolites of NMe-FOSA and NEt-FOSA. Nontargeted detection of metabolites in zebrafish larvae exposed to 5  $\mu$ M of NMe-FOSA (top panel) and NEt-FOSA (bottom panel) was accomplished using the R scripts as detailed in method section. The sizes and colors of the dots are proportional to intensities. PFOS (**46**) and PFOSA (**60**) were confirmed with authentic standards (confidence level 1). Notes: NMe-FOSA, N-Methylperfluorooctanesulfonamide; NEt-FOSA, N-Ethylperfluorooctanesulfonamide; PFOSA, perfluorooctanesulfonamide; PFOS, perfluorooctanesulfonic acid.

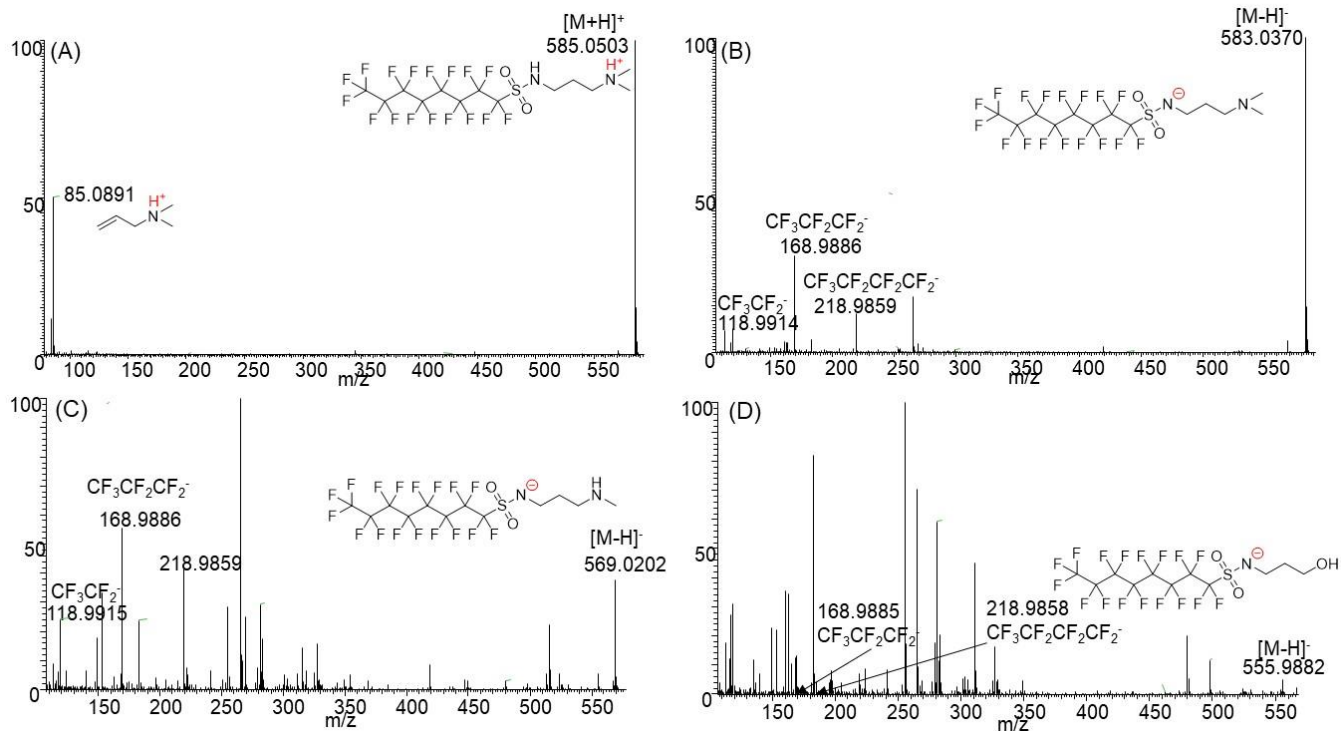

**Figure S3:** Metabolites of perfluorooctane sulfonamide quaternary ammonium salt (PFOSAmS, **5**). Tentative identification of metabolites from PFOSAmS was accomplished by interpreting the high-resolution MS<sup>2</sup> spectra of the three most abundant metabolite.



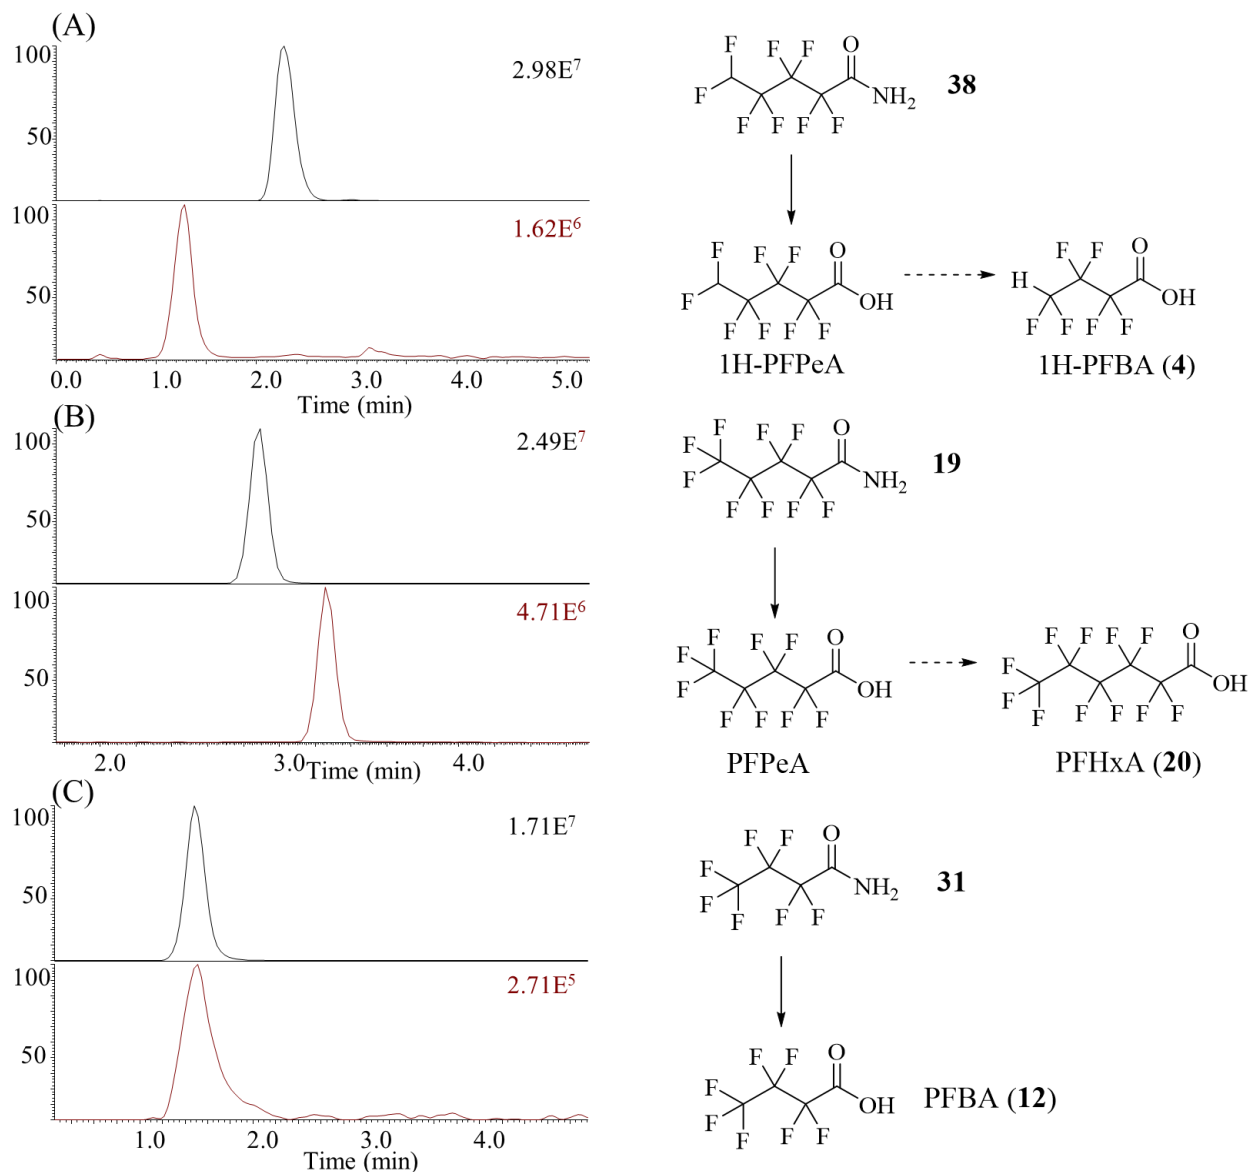

**Figure S4:** Representative chromatograms of shorter-chain PFCAs in zebrafish larvae metabolized from perfluoroalkyl carboxamides. (A) The chromatograms of 1H-PFPeA metabolized from amide **38** (top), and 1H-PFBA (bottom) directly exposed to zebrafish larvae. (B) The chromatograms of PFPeA metabolized from amide **19** (top), and PFHxA directly exposed to zebrafish larvae. (C) The chromatograms of PFBA metabolized from amide **38** (top), and PFBA directly exposed to zebrafish larvae. 1H-PFBA (**4**), PFHxA (**20**), PFBA (**12**) and PFPeA were confirmed with authentic standards (confidence level 1). The authentic standard of 1H-PFPeA was not available (confidence level 3). Note: PFBA, perfluorobutanoic acid; PFHxA, perfluorohexanoic acid; PFPeA, perfluoropentanoic Acid.

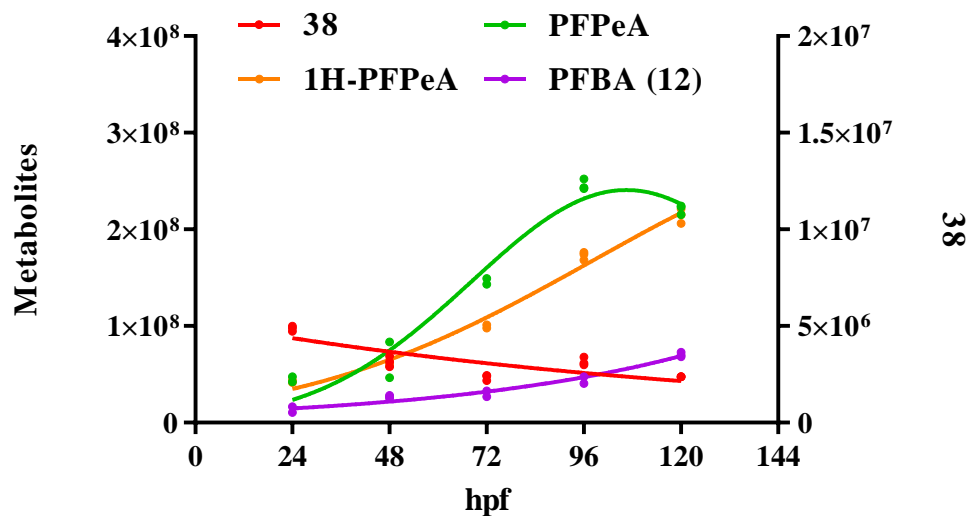

**Figure S5.** Time courses of carboxamides and polyfluoroalkyl carboxylic acids metabolites. Parent compound and carboxylic acids metabolites of **19**, **31** and **38** were monitored separately across development in zebrafish exposed to 5  $\mu$ M of each parent carboxamides. The peak areas of polyfluoroalkyl carboxylic acid metabolites were plotted against the left y-axis, while the peak area of carboxamide **38** was plotted against the right y-axis. Perfluorobutanoic acid (PFBA, **12**) and perfluoropentanoic acid (PFPeA) were confirmed with authentic standards (confidence level 1). The authentic standard of 1H-PFPeA was not available (confidence level 3). The summary data can be found in Excel Table S8.

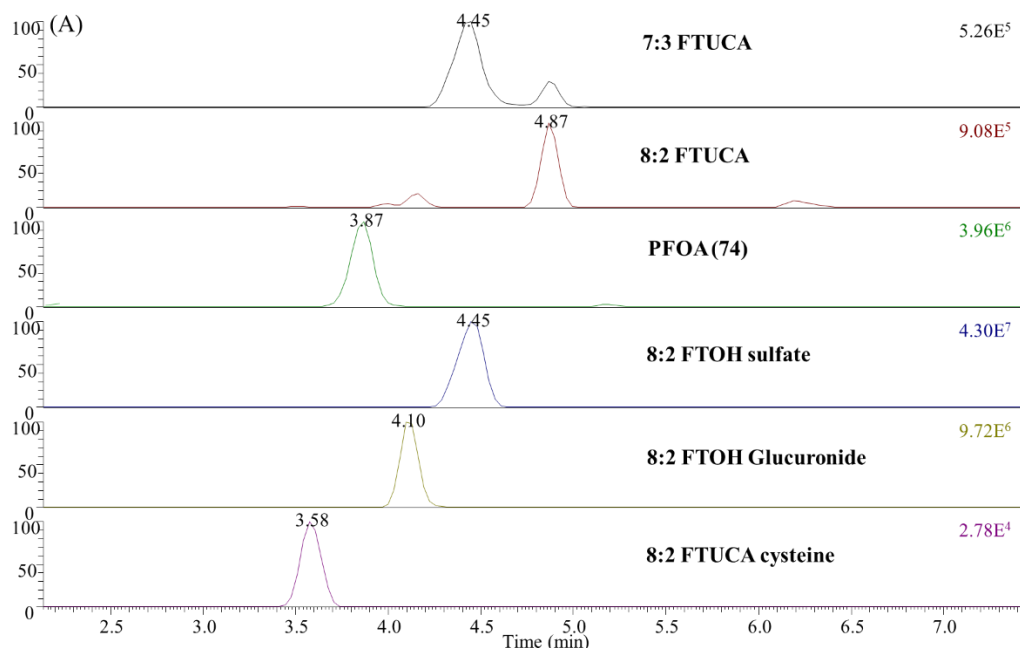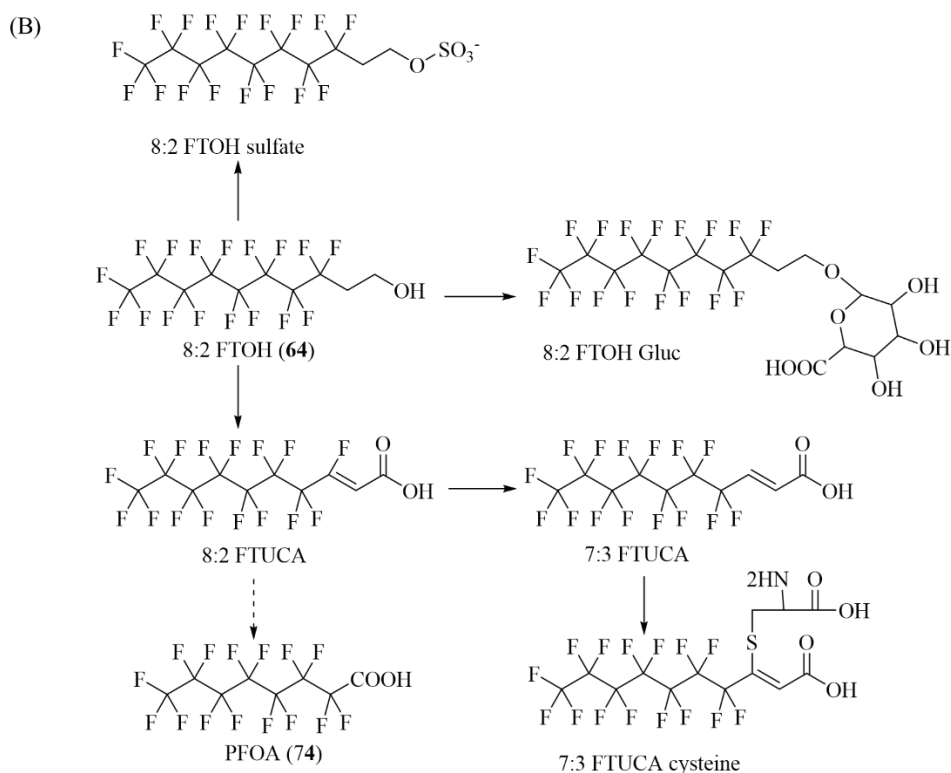

**Figure S6:** Hydrolysis products of 8:2 FTOH. Representative metabolites of 8:2 FTOH were detected in zebrafish larvae exposed to 5 $\mu$ M of 8:2 FTOH after 120h exposure. (A) Chromatograms of representative metabolites; (B) Proposed metabolism pathways. PFOA (**74**) was confirmed with authentic standards (confidence level 1). The authentic standards of 7:3 FTUCA, 8:2 FTUCA, 8:2 FTOH sulfate, 8:2 FTOH Gluc, 7:3 FTUCA cysteine were not available (confidence level 3). Note:

FTOHs, fluorotelomer alcohols; FTUCA, fluorotelomer unsaturated carboxylic acids; PFOA, perfluorooctanoic acid.

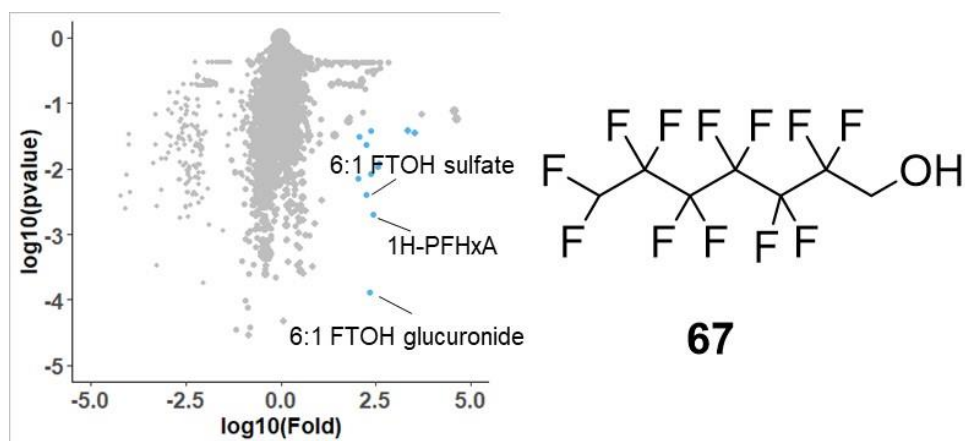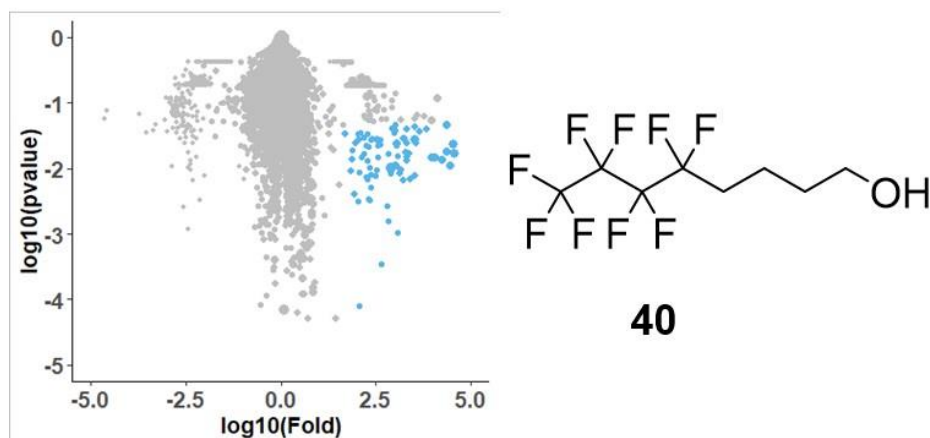

**Figure S7:** Metabolites of two FTOH. Metabolites detected in zebrafish larvae exposed to H-6:1 FTOH (**67**) and 4:4 FTOH (**40**) were plotted versus the intensities of metabolites from 8:2 FTOH. Blue dots represent metabolites showing significantly higher fold-changes ( $FC > 20$ ,  $p < 0.05$ , student's t-test) relative to 8:2 FTOH. The authentic standards of 1H-PFHxA, 6:1 FTOH sulfate and 6:1 FTOH glucuronide were not available (confidence level 3). Note: FTOHs, fluorotelomer alcohols; PFHxA, perfluorohexanoic acid.

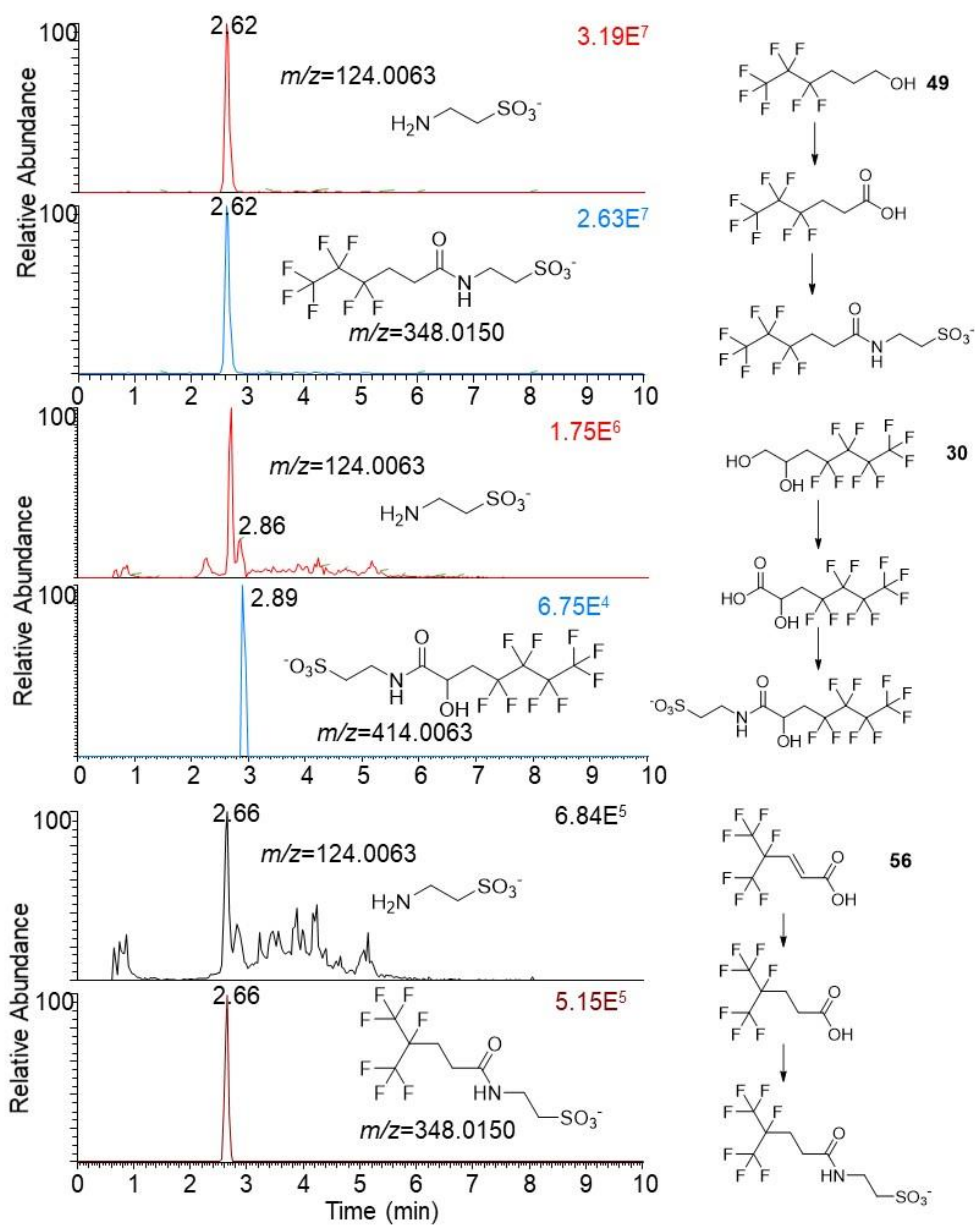

**Figure S8.** Taurine metabolites of PFAS **49**, **30**, and **56** in zebrafish. Taurine conjugates from PFAS were identified by employing high-resolution MS<sup>2</sup> spectra. The authentic standards of metabolites were not available, so they were tentatively identified at confidence level 3.

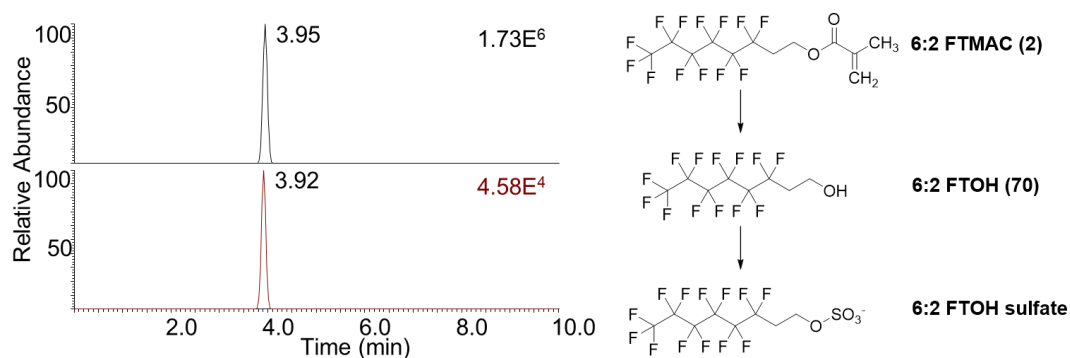

**Figure S9.** Metabolite of 6:2 FTMAC. 6:2 FTOH sulfate was detected in zebrafish larvae exposed to 5  $\mu\text{M}$  of compound **2**. The chromatograms of 6:2 FTOH sulfate from compound **2** and the control are shown in the top and bottom panels. Note that minor background contamination was detected from the control. The proposed metabolism pathway of compound **2** is shown on the right. 6:2 FTOH (**70**) was confirmed with authentic standards (confidence level 1). The authentic standards of 6:2 FTOH sulfate was not available (confidence level 3). Note: FTOHs, fluorotelomer alcohols.

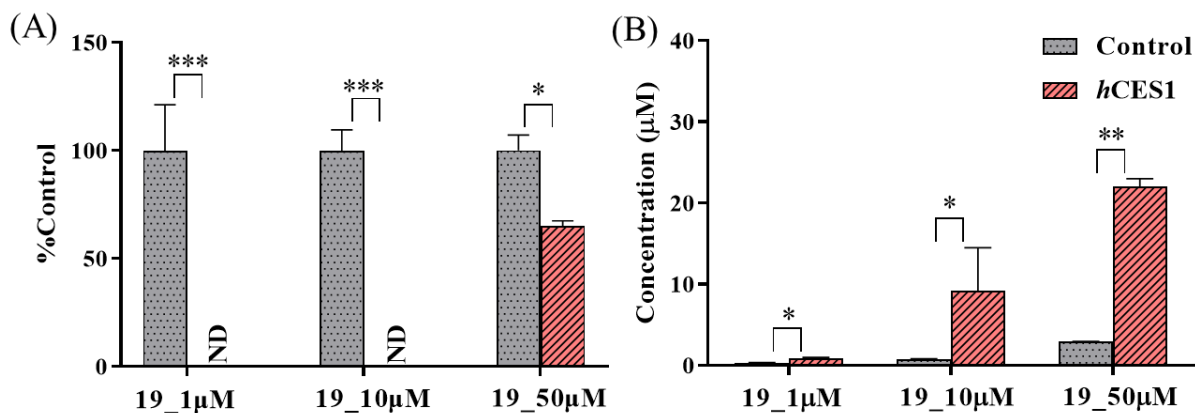

**Figure S10.** Hydrolysis of polyfluoroalkyl carboxamide **19** by hCES1. Reaction mixtures contained various concentrations **19** and 100 μg/L human recombinant human liver carboxylesterase 1 (*hCES1*) was incubated with 100 μL phosphate buffer at 37 °C for 1 hour, N=3. (A) The percentages of parent PFAS hydrolyzed by *hCES1*. (B) The concentrations of corresponding hydrolysis product perfluoropentanoic acid (PFPeA) detected. One-way ANOVA with Dunnett test was employed for the statistical test. Asterisk indicates \*0.01<p<0.05, \*\*0.01<p<0.001 and \*\*\*p<0.0001. Bars represent mean ± SD (n=3). Notes: The summary data can be found in Excel Tables S9 and S10.

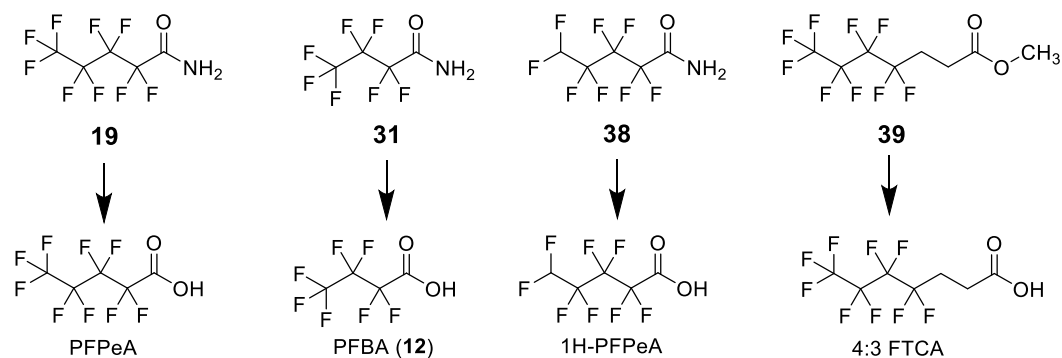

**Figure S11.** Structures of hydrolysis products detected in human recombinant human liver carboxylesterase 1 (*hCES1*) hydrolysis assay. Perfluorobutanoic acid (PFBA, **12**) and perfluoropentanoic acid (PFPeA) were confirmed with authentic standards, the confidence level was assigned to level 1. The authentic standards of 1H-PFPeA and 4:3 fluorotelomer carboxylic acid (FTCA) were not available, so they were confirmed with high resolution MS<sup>1</sup> and MS<sup>2</sup> spectra at confidence level 3.



## References

Yang D, Han J, Hall DR, Sun J, Fu J, Kutarna S, et al. 2020. Nontarget Screening of Per- and Polyfluoroalkyl Substances Binding to Human Liver Fatty Acid Binding Protein. *Environmental science & technology* 54(9): 5676-5686.
